# Supplementary material
Source: MDPI journal article supplement (https://www.mdpi.com/2504-477X/8/3/102)
Supplement: s1 [file s1]

## Supplementary file

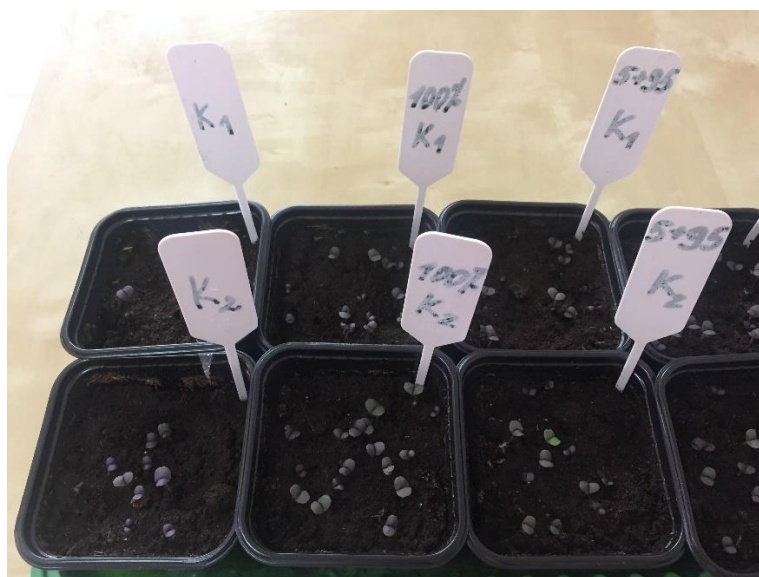

**Figure S1.** The initial stage of basil vegetation.

After being used as a substrate, all PLA/NR agrofabrics became brittle. It is impossible to determine the mechanical properties of such samples.

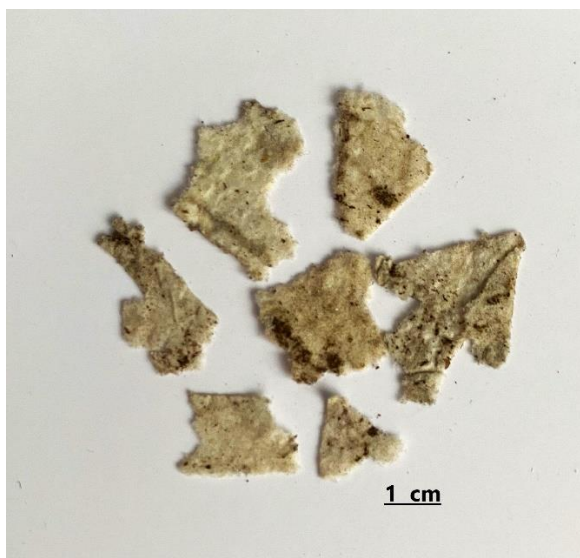

**Figure S2.** The non-woven 90PLA/10NR sample after biodegradation in soil.

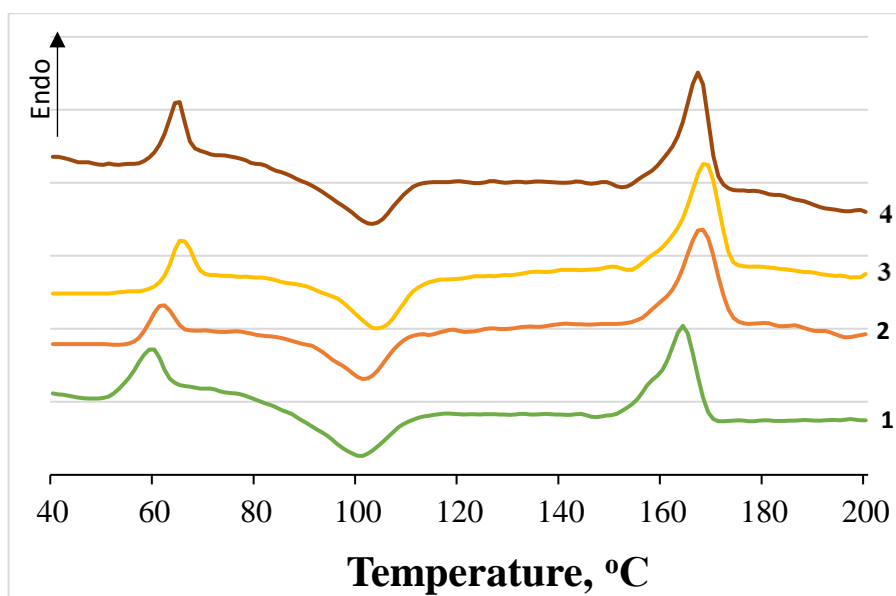

**Figure S3.** DSC thermograms of the initial non-woven PLA/NR agrofabrics containing 0, 5, 10 and 15 wt. % of NR.
